# Supplementary material for: Large Scale Comparison of Gene Expression Levels by Microarrays and RNAseq Using TCGA Data
Source: PubMed Central journal article supplement (PMC3748065; doi:10.1371/journal.pone.0071462), 2013-08-20
Supplement: pone.0071462.s002.pdf [file pone.0071462.s002.pdf]

Analysis Name: Figure3\_Agilent\_significant - 2013-06-25 01:15 PM

Analysis Creation Date: 2013-06-25

Build version: 220217

Content version: 16542223 (Release Date: 2013-05-13)

## Analysis settings

[View](#)

Reference set: Ingenuity Knowledge Base (Genes Only)

Relationship to include: Direct and Indirect

Includes Endogenous Chemicals

Optional Analyses: My Pathways My List

Filter Summary:

Consider only molecules and/or relationships where

(species = Human OR Mouse) AND

(confidence = High (predicted) OR Experimentally Observed) AND

(tissues/cell lines = Other Colon Cancer Cell Lines OR LOX IMVI OR NCI-H332M OR Ovary OR Dendritic cells not otherwise specified OR Jurkat OR Immune cell lines not otherwise specified OR Leukemia Cell Lines not otherwise specified OR J774 OR Central memory cytotoxic T cells OR Thymus OR MOLT-4 OR HOP-92 OR Other Macrophage Cancer Cell Lines OR EK VX OR Lung Cancer Cell Lines not otherwise specified OR RPMI-8266 OR UACC-257 OR Other Lung Cancer Cell Lines OR Other Lymphoma Cell Lines OR Other Immune cell lines OR SK-MEL-28 OR Lung OR Bladder OR Skeletal Muscle OR Neutrophils OR Murine NKT cells OR RAW 264.7 OR Vd2 Gamma-delta T cells OR Other Myeloma Cell Lines OR Other T lymphocytes OR Vd1 Gamma-delta T cells OR KM-12 OR Naive helper T cells OR MALME-3M OR Macrophages OR NCI-H522 OR SK-MEL-2 OR HCC-2998 OR Salivary Gland OR HCT-116 OR BDCA-3+ dendritic cells OR Monocytes OR Central memory helper T cells OR SK-MEL-5 OR Kidney OR Other B lymphocytes OR CCRF-CEM OR Other Organ Systems OR THP-1 OR

Other Tissues and Primary Cells OR Plasmacytoid dendritic cells OR NK cells not otherwise specified OR NCI-H226 OR Retina OR Th1 cells OR Cytotoxic T cells OR Melanoma Cell Lines not otherwise specified OR Activated CD56dim NK cells OR Adipose OR K-562 OR Mature monocyte-derived dendritic cells OR Testis OR Myeloma Cell Lines not otherwise specified OR Small Intestine OR Heart OR Activated CD56bright NK cells OR Memory B cells OR Uterus OR Other Dendritic cells OR M14 OR Colon Cancer Cell Lines not otherwise specified OR Spleen OR Effector T cells OR HCT-15 OR Immature monocyte-derived dendritic cells OR Effector memory cytotoxic T cells OR Natural T-regulatory cells OR Cell Line not otherwise specified OR SR OR HT29 OR Th2 cells OR Epidermis OR Pancreas OR Activated Vd1 Gamma-delta T cells OR Other Melanoma Cell Lines OR A549-ATCC OR UACC-62 OR Effector memory RA+ cytotoxic T cells OR HL-60 OR Organ Systems not otherwise specified OR HOP-62 OR Other Immune cells OR SW-620 OR Other Leukemia Cell Lines OR BDCA-1+ dendritic cells OR Lymphoma Cell Lines not otherwise specified OR Immune cells not otherwise specified OR Mammary Gland OR Activated helper T cells OR Placenta OR Monocyte-derived macrophage OR Stomach OR Other Cell Line OR Liver OR NCI-H23 OR Prostate Gland OR CD56dim NK cells OR Effector memory helper T cells OR Macrophage Cancer Cell Lines not otherwise specified OR CD56bright NK cells OR Tissues and Primary Cells not otherwise specified OR T lymphocytes not otherwise specified OR Naive B cells OR Large Intestine OR COLO205 OR Activated Vd2 Gamma-delta T cells OR Cells not otherwise specified OR Other NK cells OR H460 OR Other Cells OR B lymphocytes not otherwise specified) AND

(data sources = BIND OR BIOGRID OR Cogna OR DIP OR Gene Ontology (GO) OR Ingenuity Expert Findings OR Ingenuity ExpertAssist Findings OR INTACT OR Interactome studies OR MINT OR MIPS OR miRBase OR miRecords OR TarBase OR TargetScan Human)

Cutoff:

Fold Change = 2.000

## Top Networks

| ID | Associated Network Functions                                                                 | Score |
|----|----------------------------------------------------------------------------------------------|-------|
| 1  | Cellular Assembly and Organization, Cancer, Reproductive System Disease                      | 39    |
| 2  | Cancer, Dermatological Diseases and Conditions, Developmental Disorder                       | 36    |
| 3  | Connective Tissue Disorders, Inflammatory Disease, Skeletal and Muscular Disorders           | 30    |
| 4  | Connective Tissue Disorders, Dermatological Diseases and Conditions, Developmental Disorder  | 28    |
| 5  | Endocrine System Development and Function, Small Molecule Biochemistry, Cellular Development | 27    |



## Top Bio Functions

### Diseases and Disorders

| Name                                   | p-value             | # Molecules |
|----------------------------------------|---------------------|-------------|
| Cancer                                 | 7.78E-44 - 3.03E-04 | 589         |
| Reproductive System Disease            | 7.78E-44 - 1.48E-04 | 248         |
| Gastrointestinal Disease               | 1.33E-23 - 2.48E-04 | 288         |
| Dermatological Diseases and Conditions | 4.36E-17 - 3.13E-04 | 180         |
| Connective Tissue Disorders            | 3.33E-14 - 2.43E-04 | 143         |

### Molecular and Cellular Functions

| Name                              | p-value             | # Molecules |
|-----------------------------------|---------------------|-------------|
| Cellular Movement                 | 2.47E-22 - 3.24E-04 | 209         |
| Cellular Growth and Proliferation | 3.37E-15 - 2.72E-04 | 285         |
| Lipid Metabolism                  | 6.44E-13 - 2.64E-04 | 139         |
| Molecular Transport               | 6.44E-13 - 3.07E-04 | 182         |
| Small Molecule Biochemistry       | 6.44E-13 - 2.64E-04 | 149         |

### Physiological System Development and Function

| Name                                           | p-value             | # Molecules |
|------------------------------------------------|---------------------|-------------|
| Organismal Survival                            | 2.12E-13 - 3.17E-05 | 251         |
| Tissue Development                             | 4.06E-12 - 1.79E-04 | 235         |
| Behavior                                       | 8.59E-12 - 2.89E-04 | 112         |
| Tissue Morphology                              | 1.02E-10 - 2.91E-04 | 263         |
| Cardiovascular System Development and Function | 1.46E-10 - 3.00E-04 | 179         |

## Top Canonical Pathways

| Name                                                | p-value  | Ratio             |
|-----------------------------------------------------|----------|-------------------|
| Agranulocyte Adhesion and Diapedesis                | 9.2E-08  | 28/185<br>(0.151) |
| Granulocyte Adhesion and Diapedesis                 | 4.03E-06 | 24/174<br>(0.138) |
| Hepatic Fibrosis / Hepatic Stellate Cell Activation | 1.59E-05 | 20/142<br>(0.141) |
| Atherosclerosis Signaling                           | 2.64E-05 | 18/133<br>(0.135) |
| Xenobiotic Metabolism Signaling                     | 6.42E-05 | 30/289<br>(0.104) |

## Top Molecules

### Fold Change up-regulated

| Molecules | Exp. Value | Exp. Chart |
|-----------|------------|------------|
| COL11A1   | ↑7.573     |            |
| COL10A1   | ↑7.015     |            |
| GJB2      | ↑6.152     |            |
| MMP13     | ↑5.721     |            |
| PPAPDC1A  | ↑5.681     |            |
| MMP11     | ↑5.386     |            |
| CEACAM6   | ↑5.326     |            |
| CXCL11    | ↑5.116     |            |
| NEK2      | ↑4.948     |            |
| WISP1     | ↑4.501     |            |

### Fold Change down-regulated

| Molecules | Exp. Value | Exp. Chart |
|-----------|------------|------------|
| EDN3      | ↓-6.978    |            |
| NPY2R     | ↓-6.778    |            |
| FIGF      | ↓-6.573    |            |
| CA4       | ↓-6.472    |            |
| MUCL1     | ↓-6.222    |            |
| PCOLCE2   | ↓-6.165    |            |
| FABP7     | ↓-6.108    |            |
| FGFBP1    | ↓-6.066    |            |
| TNMD      | ↓-5.965    |            |
| CXCL2     | ↓-5.944    |            |

### Top Upstream Regulators

| Upstream Regulator | p-value of overlap | Predicted Activation State |
|--------------------|--------------------|----------------------------|
| TNF                | 5.39E-23           |                            |
| YY1                | 1.44E-18           |                            |
| Cg                 | 1.24E-17           | Inhibited                  |
| FOXO1              | 1.77E-14           | Activated                  |
| PPARG              | 3.20E-14           | Inhibited                  |

### Top My Lists

| Name | p-value | Ratio |
|------|---------|-------|
|------|---------|-------|

### Top My Pathways

| Name | p-value | Ratio |
|------|---------|-------|
|------|---------|-------|

### Top Tox Lists

| Name                            | p-value  | Ratio             |
|---------------------------------|----------|-------------------|
| Cardiac Hypertrophy             | 6.64E-09 | 44/344<br>(0.128) |
| Acute Renal Failure Panel (Rat) | 9.46E-07 | 14/60<br>(0.233)  |
| Cardiac Fibrosis                | 1.07E-06 | 25/171<br>(0.146) |
| Xenobiotic Metabolism Signaling | 3.67E-05 | 35/342<br>(0.102) |
| Hepatic Fibrosis                | 6.06E-05 | 15/95<br>(0.158)  |

## Top Tox Functions

### Assays: Clinical Chemistry and Hematology

| Name                                     | p-value             | # Molecules |
|------------------------------------------|---------------------|-------------|
| Increased Levels of Alkaline Phosphatase | 7.06E-03 - 3.78E-01 | 5           |
| Increased Levels of ALT                  | 3.19E-02 - 5.55E-01 | 2           |
| Decreased Levels of Albumin              | 4.93E-02 - 3.97E-01 | 3           |
| Increased Levels of CRP                  | 9.63E-02 - 9.63E-02 | 1           |
| Increased Levels of AST                  | 1.16E-01 - 1.16E-01 | 2           |

### Cardiotoxicity

| Name                               | p-value             | # Molecules |
|------------------------------------|---------------------|-------------|
| Cardiac Hypertrophy                | 4.82E-09 - 5.32E-01 | 40          |
| Pulmonary Hypertension             | 2.59E-06 - 9.63E-02 | 12          |
| Cardiac Fibrosis                   | 2.27E-05 - 5.08E-01 | 24          |
| Cardiac Congestive Cardiac Failure | 4.82E-05 - 4.82E-05 | 16          |
| Heart Failure                      | 4.82E-05 - 1.83E-01 | 26          |

### Hepatotoxicity

| Name                                 | p-value             | # Molecules |
|--------------------------------------|---------------------|-------------|
| Liver Hyperplasia/Hyperproliferation | 2.12E-07 - 1.00E00  | 58          |
| Hepatocellular Carcinoma             | 3.20E-05 - 1.00E00  | 42          |
| Liver Steatosis                      | 9.09E-04 - 1.41E-01 | 25          |
| Liver Inflammation/Hepatitis         | 3.62E-03 - 3.33E-01 | 19          |
| Liver Damage                         | 4.41E-03 - 2.62E-01 | 17          |



**Nephrotoxicity**

| Name                | p-value             | #<br>Molecules |
|---------------------|---------------------|----------------|
| Renal Dysplasia     | 8.00E-04 - 4.93E-02 | 6              |
| Kidney Failure      | 1.21E-03 - 3.71E-01 | 19             |
| Renal Inflammation  | 2.14E-03 - 1.00E00  | 9              |
| Renal Nephritis     | 2.14E-03 - 1.00E00  | 9              |
| Renal Proliferation | 2.53E-03 - 1.83E-01 | 21             |
