# Supplementary material for: Large Scale Comparison of Gene Expression Levels by Microarrays and RNAseq Using TCGA Data
Source: PubMed Central journal article supplement (PMC3748065; doi:10.1371/journal.pone.0071462), 2013-08-20
Supplement: pone.0071462.s003.pdf [file pone.0071462.s003.pdf]

Analysis Name: Figure3\_RNAseq\_significant - 2013-06-25 01:13 PM

Analysis Creation Date: 2013-06-25

Build version: 220217

Content version: 16542223 (Release Date: 2013-05-13)

## Analysis settings

[View](#)

Reference set: Ingenuity Knowledge Base (Genes Only)

Relationship to include: Direct and Indirect

Includes Endogenous Chemicals

Optional Analyses: My Pathways My List

Filter Summary:

Consider only molecules and/or relationships where

(species = Human OR Mouse) AND

(confidence = High (predicted) OR Experimentally Observed) AND

(tissues/cell lines = Other Colon Cancer Cell Lines OR LOX IMVI OR NCI-H332M OR Ovary OR Dendritic cells not otherwise specified OR Jurkat OR Immune cell lines not otherwise specified OR Leukemia Cell Lines not otherwise specified OR J774 OR Central memory cytotoxic T cells OR Thymus OR MOLT-4 OR HOP-92 OR Other Macrophage Cancer Cell Lines OR EKVX OR Lung Cancer Cell Lines not otherwise specified OR RPMI-8266 OR UACC-257 OR Other Lung Cancer Cell Lines OR Other Lymphoma Cell Lines OR Other Immune cell lines OR SK-MEL-28 OR Lung OR Bladder OR Skeletal Muscle OR Neutrophils OR Murine NKT cells OR RAW 264.7 OR Vd2 Gamma-delta T cells OR Other Myeloma Cell Lines OR Other T lymphocytes OR Vd1 Gamma-delta T cells OR KM-12 OR Naive helper T cells OR MALME-3M OR Macrophages OR NCI-H522 OR SK-MEL-2 OR HCC-2998 OR Salivary Gland OR HCT-116 OR BDCA-3+ dendritic cells OR Monocytes OR Central memory helper T cells OR SK-MEL-5 OR Kidney OR Other B lymphocytes OR CCRF-CEM OR Other Organ Systems OR THP-1 OR

Other Tissues and Primary Cells OR Plasmacytoid dendritic cells OR NK cells not otherwise specified OR NCI-H226 OR Retina OR Th1 cells OR Cytotoxic T cells OR Melanoma Cell Lines not otherwise specified OR Activated CD56dim NK cells OR Adipose OR K-562 OR Mature monocyte-derived dendritic cells OR Testis OR Myeloma Cell Lines not otherwise specified OR Small Intestine OR Heart OR Activated CD56bright NK cells OR Memory B cells OR Uterus OR Other Dendritic cells OR M14 OR Colon Cancer Cell Lines not otherwise specified OR Spleen OR Effector T cells OR HCT-15 OR Immature monocyte-derived dendritic cells OR Effector memory cytotoxic T cells OR Natural T-regulatory cells OR Cell Line not otherwise specified OR SR OR HT29 OR Th2 cells OR Epidermis OR Pancreas OR Activated Vd1 Gamma-delta T cells OR Other Melanoma Cell Lines OR A549-ATCC OR UACC-62 OR Effector memory RA+ cytotoxic T cells OR HL-60 OR Organ Systems not otherwise specified OR HOP-62 OR Other Immune cells OR SW-620 OR Other Leukemia Cell Lines OR BDCA-1+ dendritic cells OR Lymphoma Cell Lines not otherwise specified OR Immune cells not otherwise specified OR Mammary Gland OR Activated helper T cells OR Placenta OR Monocyte-derived macrophage OR Stomach OR Other Cell Line OR Liver OR NCI-H23 OR Prostate Gland OR CD56dim NK cells OR Effector memory helper T cells OR Macrophage Cancer Cell Lines not otherwise specified OR CD56bright NK cells OR Tissues and Primary Cells not otherwise specified OR T lymphocytes not otherwise specified OR Naive B cells OR Large Intestine OR COLO205 OR Activated Vd2 Gamma-delta T cells OR Cells not otherwise specified OR Other NK cells OR H460 OR Other Cells OR B lymphocytes not otherwise specified) AND

(data sources = BIND OR BIOGRID OR Cognition OR DIP OR Gene Ontology (GO) OR Ingenuity Expert Findings OR Ingenuity ExpertAssist Findings OR INTACT OR Interactome studies OR MINT OR MIPS OR miRBase OR miRecords OR TarBase OR TargetScan Human)

Cutoff:

Fold Change = 2.000

## Top Networks

| ID | Associated Network Functions                                                                  | Score |
|----|-----------------------------------------------------------------------------------------------|-------|
| 1  | Organ Morphology, Skeletal and Muscular System Development and Function, Neurological Disease | 37    |
| 2  | Reproductive System Development and Function, Embryonic Development, Organ Development        | 32    |
| 3  | Lipid Metabolism, Molecular Transport, Small Molecule Biochemistry                            | 32    |
| 4  | Cell-To-Cell Signaling and Interaction, Tissue Development, Cellular Function and Maintenance | 32    |
| 5  | Cell Cycle, Hepatic System Development and Function, Cancer                                   | 30    |



## Top Bio Functions

### Diseases and Disorders

| Name                        | p-value             | # Molecules |
|-----------------------------|---------------------|-------------|
| Cancer                      | 2.63E-35 - 3.87E-04 | 822         |
| Reproductive System Disease | 2.63E-35 - 2.42E-04 | 291         |
| Respiratory Disease         | 2.24E-20 - 1.79E-04 | 496         |
| Nutritional Disease         | 2.31E-17 - 1.42E-04 | 138         |
| Neurological Disease        | 3.59E-16 - 4.26E-04 | 289         |

### Molecular and Cellular Functions

| Name                                   | p-value             | # Molecules |
|----------------------------------------|---------------------|-------------|
| Lipid Metabolism                       | 7.48E-13 - 1.97E-04 | 162         |
| Molecular Transport                    | 7.48E-13 - 4.28E-04 | 316         |
| Small Molecule Biochemistry            | 7.48E-13 - 3.62E-04 | 219         |
| Cell-To-Cell Signaling and Interaction | 2.17E-12 - 4.01E-04 | 158         |
| Cellular Movement                      | 3.14E-11 - 3.50E-04 | 225         |

### Physiological System Development and Function

| Name                                                  | p-value             | # Molecules |
|-------------------------------------------------------|---------------------|-------------|
| Behavior                                              | 1.16E-16 - 3.70E-04 | 165         |
| Organ Morphology                                      | 1.88E-12 - 4.33E-04 | 190         |
| Skeletal and Muscular System Development and Function | 1.88E-12 - 4.33E-04 | 149         |
| Nervous System Development and Function               | 2.17E-12 - 4.78E-04 | 218         |
| Endocrine System Development and Function             | 2.27E-10 - 3.62E-04 | 99          |

## Top Canonical Pathways

| Name                                 | p-value  | Ratio             |
|--------------------------------------|----------|-------------------|
| Atherosclerosis Signaling            | 3.01E-08 | 28/133<br>(0.211) |
| Agranulocyte Adhesion and Diapedesis | 3.31E-07 | 34/185<br>(0.184) |
| LXR/RXR Activation                   | 4.43E-07 | 26/126<br>(0.206) |
| Granulocyte Adhesion and Diapedesis  | 6.12E-06 | 30/174<br>(0.172) |
| Serotonin Receptor Signaling         | 7.75E-05 | 10/33<br>(0.303)  |

## Top Molecules

### Fold Change up-regulated

| Molecules | Exp. Value | Exp. Chart |
|-----------|------------|------------|
| S100A7A   | ↑9.653     |            |
| CPLX2     | ↑9.166     |            |
| KLHL1     | ↑9.048     |            |
| MAGEA12   | ↑8.829     |            |
| CARTPT    | ↑8.758     |            |
| CST4      | ↑8.649     |            |
| S100A7    | ↑8.418     |            |
| CASP14    | ↑8.021     |            |
| NEUROD4   | ↑7.890     |            |
| SSX1      | ↑7.808     |            |

### Fold Change down-regulated

| Molecules | Exp. Value | Exp. Chart |
|-----------|------------|------------|
| CSN2      | ↓-9.760    |            |
| MYOC      | ↓-5.682    |            |
| CFHR5     | ↓-5.462    |            |
| DLK1      | ↓-5.119    |            |
| ITLN1     | ↓-5.067    |            |
| KLK3      | ↓-5.026    |            |
| ANGPTL7   | ↓-4.931    |            |
| HBG1      | ↓-4.863    |            |
| LEP       | ↓-4.854    |            |
| SCGB1A1   | ↓-4.824    |            |

### Top Upstream Regulators

| Upstream Regulator | p-value of overlap | Predicted Activation State |
|--------------------|--------------------|----------------------------|
| CTNNB1             | 4.43E-15           |                            |
| CSF2               | 9.03E-14           | Activated                  |
| YY1                | 2.73E-13           |                            |
| HDAC1              | 8.78E-13           |                            |
| IL1B               | 5.95E-12           |                            |

**Top My Lists**

| Name | p-value | Ratio |
|------|---------|-------|
|------|---------|-------|

**Top My Pathways**

| Name | p-value | Ratio |
|------|---------|-------|
|------|---------|-------|

**Top Tox Lists**

| Name                            | p-value  | Ratio             |
|---------------------------------|----------|-------------------|
| LXR/RXR Activation              | 7.31E-07 | 26/124<br>(0.21)  |
| Cardiac Hypertrophy             | 4.26E-06 | 49/344<br>(0.142) |
| Cardiac Fibrosis                | 1.52E-05 | 29/171<br>(0.17)  |
| Acute Renal Failure Panel (Rat) | 7.71E-05 | 14/60<br>(0.233)  |
| Increases Renal Proliferation   | 3.45E-04 | 20/119<br>(0.168) |

## Top Tox Functions

### Assays: Clinical Chemistry and Hematology

| Name                                     | p-value             | # Molecules |
|------------------------------------------|---------------------|-------------|
| Increased Levels of Alkaline Phosphatase | 1.50E-02 - 3.07E-01 | 7           |
| Increased Levels of Potassium            | 1.62E-02 - 2.70E-01 | 5           |
| Decreased Levels of Albumin              | 2.86E-02 - 2.02E-01 | 3           |
| Increased Levels of ALT                  | 6.50E-02 - 1.00E00  | 2           |
| Increased Levels of Bilirubin            | 6.50E-02 - 6.50E-02 | 2           |

### Cardiotoxicity

| Name                               | p-value             | # Molecules |
|------------------------------------|---------------------|-------------|
| Cardiac Arrythmia                  | 5.19E-08 - 2.60E-01 | 34          |
| Heart Failure                      | 2.85E-07 - 1.40E-01 | 40          |
| Cardiac Arteriopathy               | 5.85E-06 - 3.26E-01 | 43          |
| Cardiac Congestive Cardiac Failure | 5.09E-05 - 5.09E-05 | 20          |
| Cardiac Hypertrophy                | 7.81E-05 - 2.02E-01 | 44          |

### Hepatotoxicity

| Name                                 | p-value             | # Molecules |
|--------------------------------------|---------------------|-------------|
| Liver Hyperplasia/Hyperproliferation | 8.36E-06 - 5.95E-01 | 71          |
| Hepatocellular Carcinoma             | 3.25E-04 - 3.64E-01 | 52          |
| Liver Failure                        | 2.30E-03 - 6.69E-02 | 6           |
| Liver Hyperbilirubinemia             | 5.27E-03 - 5.27E-03 | 2           |
| Liver Inflammation/Hepatitis         | 6.26E-03 - 5.95E-01 | 31          |



**Nephrotoxicity**

| Name                | p-value             | #<br>Molecules |
|---------------------|---------------------|----------------|
| Kidney Failure      | 1.89E-04 - 3.98E-01 | 28             |
| Renal Dysplasia     | 6.15E-04 - 7.26E-02 | 6              |
| Renal Proliferation | 1.61E-03 - 1.63E-01 | 26             |
| Renal Inflammation  | 6.47E-03 - 1.00E00  | 18             |
| Renal Nephritis     | 6.47E-03 - 1.00E00  | 18             |
